# Supplementary material for: Reframing Water-Related Ecosystem Services Flows
Source: Preprints.org preprint supplement (doi:10.20944/preprints202101.0210.v1), 2021-01-12
Supplement: Supplementary file 1 [file supplementary]

# Supplementary Information

## Reframing water-related ecosystem services flow

Jingyu Lin, Jinliang Huang, Michalis Hadjikakou, Yaling Huang, Kun Li, Brett A. Bryan

Table legend: table S1-S4

Figure legend: figure S1-S4

Number of pages: 5

**Table S1.** Data sources for RSPARROW model

| PARAMETRES                  | TYPES                  | NAME                                                            | SOURCES                                                                                                                   |
|-----------------------------|------------------------|-----------------------------------------------------------------|---------------------------------------------------------------------------------------------------------------------------|
| Pollution sources           | Point source pollution | Sewage discharge                                                | Longyan, Zhangzhou, Quanzhou Statistical Yearbook-2018(Longyan, Zhangzhou, Quanzhou Municipal Bureau of Statistics, 2018) |
|                             |                        | Industrial discharge                                            |                                                                                                                           |
|                             |                        | Fertilizer application                                          |                                                                                                                           |
|                             | Non-point sources      | Livestock breeding                                              | Field monitoring                                                                                                          |
|                             |                        | Atmospheric deposition                                          |                                                                                                                           |
|                             | Land use               | Built-up area, cropland, forest, shrub, wetlands, barren, grass | <a href="http://data.ess.tsinghua.edu.cn/">http://data.ess.tsinghua.edu.cn/</a>                                           |
| Land-water delivery factors | Land delivery factor   | Precipitation                                                   | Longyan Water Resources Bulletin (2017), Zhangzhou Climatic Bulletin (2017), Quzhou Climatic Bulletin (2017)              |
|                             |                        | Air temperature                                                 | <a href="http://data.cma.cn/">http://data.cma.cn/</a>                                                                     |
|                             |                        | Drainage density                                                | Calculated in Arcgis                                                                                                      |
|                             |                        | Soil clay                                                       | <a href="http://www.fao.org/home/en/">http://www.fao.org/home/en/</a>                                                     |
|                             | Water delivery factor  | Riverine delivery                                               | Computed by RSPARROW                                                                                                      |
|                             |                        | Reservoir delivery                                              |                                                                                                                           |
| Others                      | fixed                  | Reach length                                                    | Calculated in Arcgis with Archydro tool                                                                                   |
|                             |                        | Reach name                                                      |                                                                                                                           |
|                             |                        | Headwater reach indicator                                       |                                                                                                                           |
|                             |                        | Station ID                                                      |                                                                                                                           |
|                             |                        | Reach total drainage area                                       |                                                                                                                           |
|                             |                        | Reach time of travel                                            |                                                                                                                           |
|                             |                        | Areal hydraulic load for reservoir                              |                                                                                                                           |
|                             |                        | Alphanumeric station ID                                         |                                                                                                                           |

|                                       |                                                 |
|---------------------------------------|-------------------------------------------------|
| Station name                          |                                                 |
| Station latitude                      |                                                 |
| Station longitude                     |                                                 |
| Mean annual streamflow                | By HSPF model                                   |
| Mean load response variable           | By rloadest package in R based on sampling data |
| Mean load. Response variable standard |                                                 |

**Table S2.** Model performance metrics were reported for the conditioned (estimated) and unconditioned (simulated) predictions. Model estimation performance metrics provided the accuracy of the non-linear least square (NLLS) model estimation applied in the Jiulong River watershed while model simulated predictions were computed using mean coefficients from the NLLS model, respectively.

|            | MSE  | RMSE | R <sup>2</sup> | R <sup>2</sup> <sub>adj</sub> | R <sup>2</sup> <sub>Yield</sub> | PB    |
|------------|------|------|----------------|-------------------------------|---------------------------------|-------|
| Estimation | 0.15 | 0.39 | 0.93           | 0.87                          | 0.92                            | -5.54 |
| Simulation | 0.16 | 0.40 | 0.93           | 0.87                          | 0.92                            | -7.64 |

Note: MSE = Mean Sum of Squares of Error, RMSE = Root Mean Sum of Squares of Error, R<sup>2</sup><sub>adj</sub> = Adjust R<sup>2</sup>, R<sup>2</sup><sub>Yield</sub> = Yield R<sup>2</sup> expressed as the R<sup>2</sup> adjusted for the mean log drainage area, PB = Percent Bias, expressed as the ratio of the sum of the model residuals to the sum of the observed load across calibration sites.

**Table S3.** Parameters selection of the RSPARROW models in the study area.

| Type                  | Selected parameters | Estimate | P-VALUE | VIF  |
|-----------------------|---------------------|----------|---------|------|
| Nitrogen sources      | Sewage discharge    | 2.75     | 0.04    | 1.16 |
|                       | Livestock manure    | 2.65     | 0.13    | 7.47 |
|                       | Fertilizer          | 0.40     | 0.05    | 5.34 |
| Land delivery factor  | Slope               | 11.37    | 0.01    | 6.67 |
|                       | Drainage density    | 0.94     | 0.00    | 2.92 |
| Water delivery factor | Reach decay1        | 4.41     | 0.00    | 2.30 |
|                       | Reach decay3        | 1.67     | 0.00    | 3.39 |

Note: VIF = Variance Inflation Factor, a measure of the importance of multicollinearity in the parameters.

**Table S4.** Specific information on produced and effluent coefficients.

| Items | Livestock                      |                               | Sewage discharge                                  |                                                                        |                                                       | Fertilizer application<br>(kg ha <sup>-1</sup> year <sup>-1</sup> ) | Wet deposition<br>(kg ha <sup>-1</sup> year <sup>-1</sup> ) |
|-------|--------------------------------|-------------------------------|---------------------------------------------------|------------------------------------------------------------------------|-------------------------------------------------------|---------------------------------------------------------------------|-------------------------------------------------------------|
|       | Cattle<br>(g d <sup>-1</sup> ) | Swine<br>(g d <sup>-1</sup> ) | Urban<br>(mg L <sup>-1</sup> year <sup>-1</sup> ) | Rural<br>(g L <sup>-1</sup> capital <sup>-1</sup> year <sup>-1</sup> ) | Industry<br>(kg ha <sup>-1</sup> year <sup>-1</sup> ) |                                                                     |                                                             |

|                             |                                  |       |                                   |           |                                                                 |           |               |
|-----------------------------|----------------------------------|-------|-----------------------------------|-----------|-----------------------------------------------------------------|-----------|---------------|
| <b>Produced coefficient</b> | 130.6<br>2                       | 25.40 | 32.6-37.8                         | 3.61-4.09 | 15.5-<br>438.12                                                 | 0.92-9.63 | 25.37-38.98   |
| <b>Effluent coefficient</b> | 83                               | 12.36 | 22.67-<br>23.10                   | 3.33-3.74 | 2-24.45                                                         | 0.92-9.63 | 25.37-38.98   |
| <b>Sources</b>              | The First China pollution Census |       | The Second China pollution Census |           | Statistics Yearbook 2018 in Zhangzhou, Longyan, and Xiamen City |           | Sampling data |

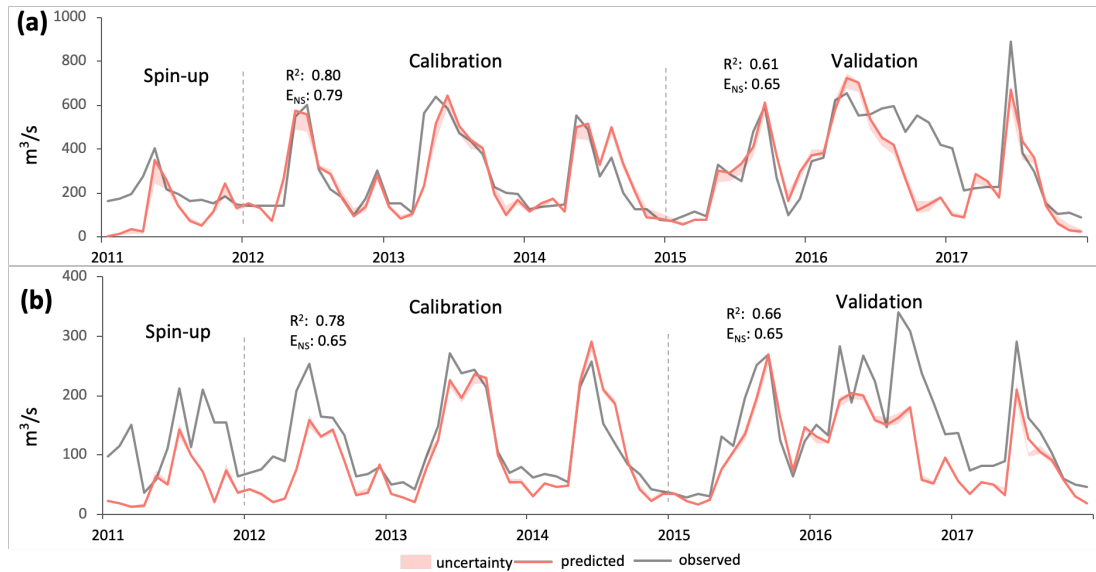

**Figure S1.** Monthly performance of the Hydrological Simulation Program FORTRAN model in the Jiulong River watershed with uncertainty. Comparison of predicted streamflow with observed data in **(a)** North river and **(b)** in West river from 2011 to 2017. ENS: Nash-Sutcliffe efficiency.

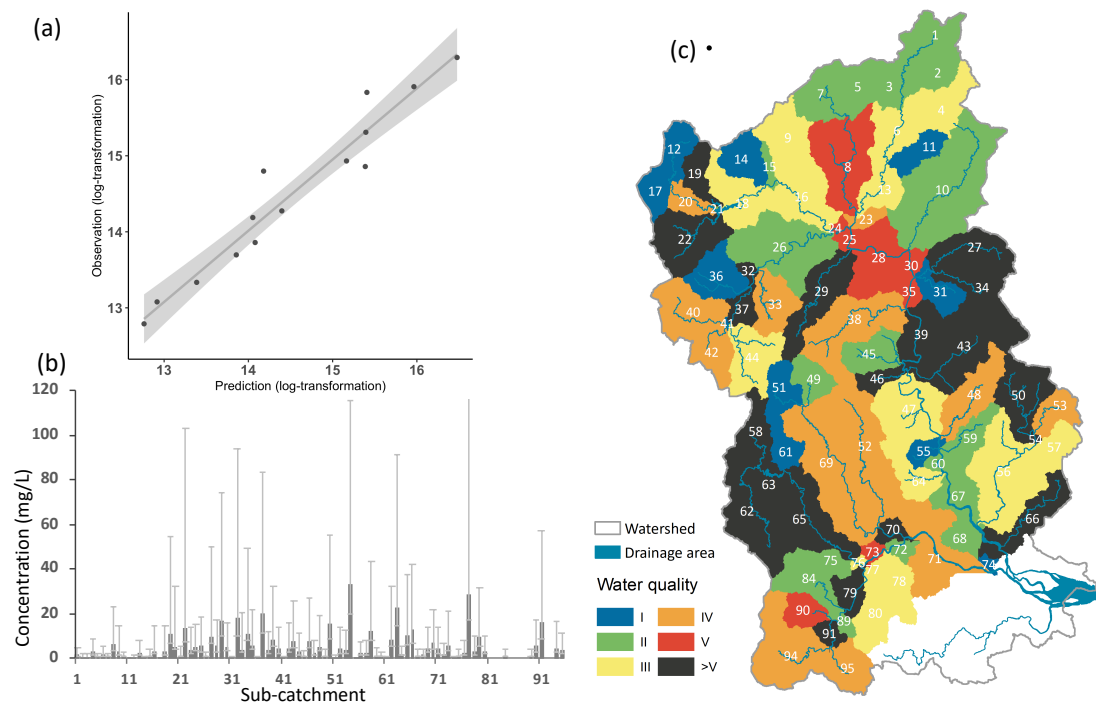

**Figure S2.** RSPARROW model performance in the study area. Panel (a) presents the observed load versus monitoring-adjusted predictions with log-transformation, while panel (b) shows the uncertainty analysis (error bar: 90% confidence interval) of total nitrogen concentration in all sub-catchments. Panel (c) maps the water quality (under  $\text{NH}_4^+\text{-N}$ ). Note: I ( $\text{NH}_4^+\text{-N} \leq 0.15$ ), II ( $0.15 < \text{NH}_4^+\text{-N} \leq 0.50$ ), III ( $0.50 < \text{NH}_4^+\text{-N} \leq 1$ ), IV ( $1.00 < \text{NH}_4^+\text{-N} \leq 1.50$ ), V ( $1.50 < \text{NH}_4^+\text{-N} \leq 2.00$ ), >V ( $2.00 < \text{NH}_4^+\text{-N}$ ).

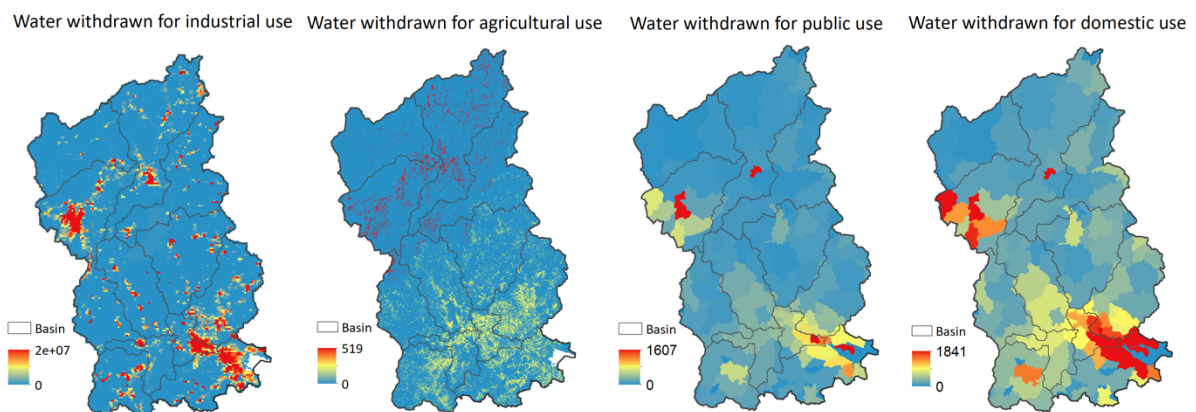

**Figure S3.** Water withdrawn for industrial use, agricultural use, public use and domestic use (unit: Gigalitre, GL).

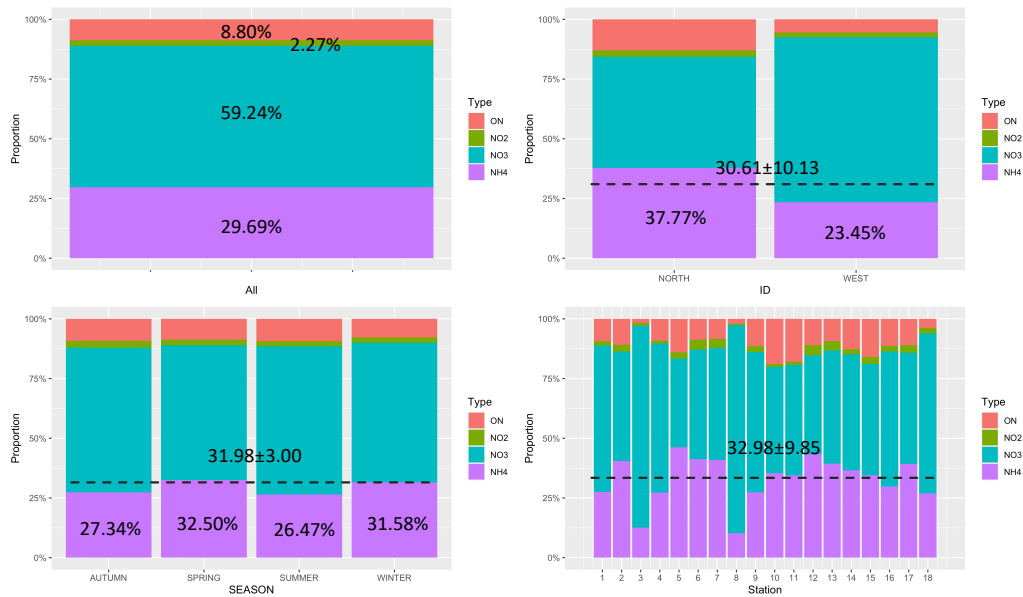

**Figure S4.** Nitrogen composition in Jiulong River watershed. Numbers in each box show the mean  $\pm$  1 standard deviation.

#### Detailed information of water samples experiment:

The water samples were kept at 4°C and transported to the laboratory. Water samples were immediately filtered through 0.45  $\mu$ m nucleopore membranes before N analysis. Total nitrogen (TN), ammonia nitrogen ( $\text{NH}_4^+$ ), nitrate ( $\text{NO}_3^-$ ) were determined following standard methods and completed within 24 hours after sampling.

#### Detailed information of socio-economic data:

All socio-economic data were collected from the Statistics Yearbook in Longyan (2018) and Zhangzhou (2018), the Statistical Communique of Zhangzhou, and Longyan on National Economic and Social Development (2018). We computed an aggregated spatial demand layer according to equation (1) and used the Zonal Statistic tool in ArcGIS to calculate water demand for each basin.
